# Supplementary material for: Climate-induced hydrologic change in the source region of the Yellow River: a new assessment including varying permafrost
Source: Copernicus journal article supplement (doi:10.5194/hess-2017-744), 2018-02-22
Supplement: Supplementary file [file hess-2017-744-AC1-supplement.pdf]

To further exam the efficiency of 11-year moving average method in removing water storage change in study area, we use ABCD (Thomas, 1981) model to simulate the three sub-basins discharge change. Results are shown as following:

5      **1. Model calibration and validation**

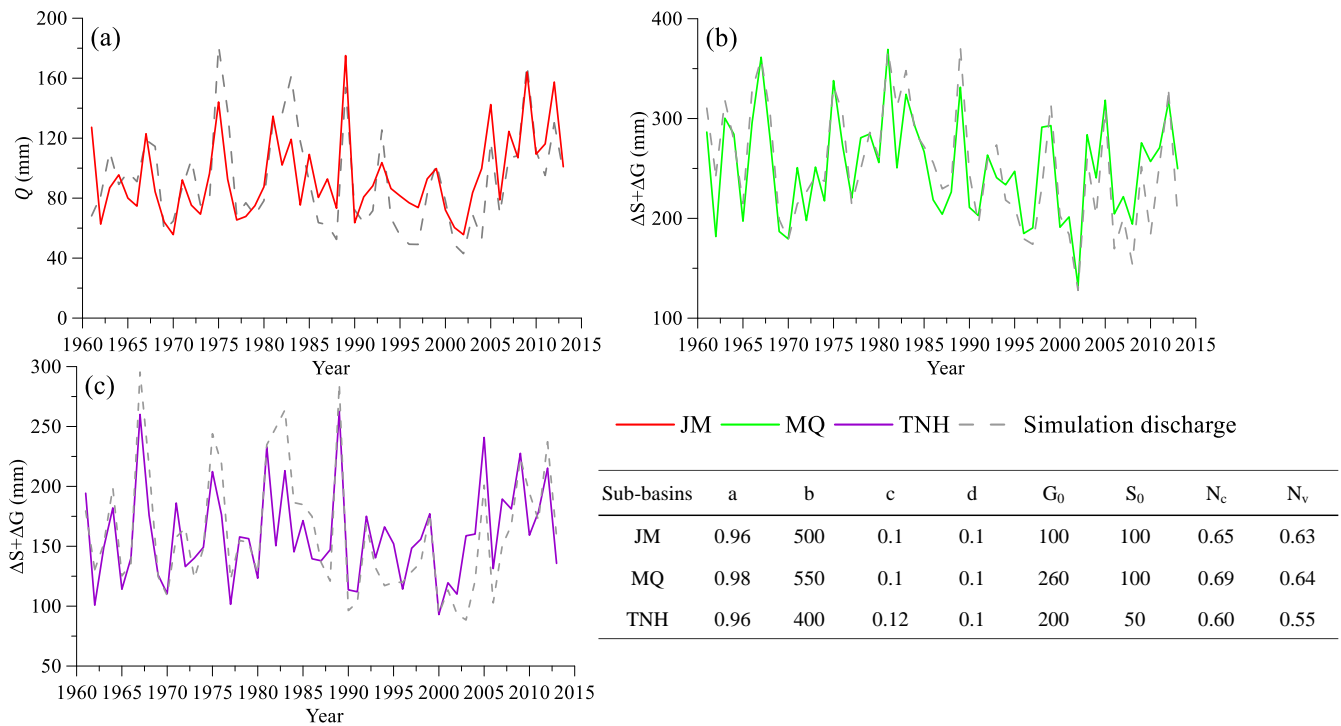

Figure 1 Discharge simulated by ABCD

The performance of ABCD model is evaluated by Nash–Sutcliffe efficiency. Generally model performance is very good if  $R^2 > 0.75$ , satisfactory if  $0.36 < R^2 < 0.75$ , and unsatisfactory if  $R^2 < 0.36$  (Nashand Sutcliffe, 1970; Krause et al., 2005; Moriasi et al., 2007).

**2. Water storage variation**

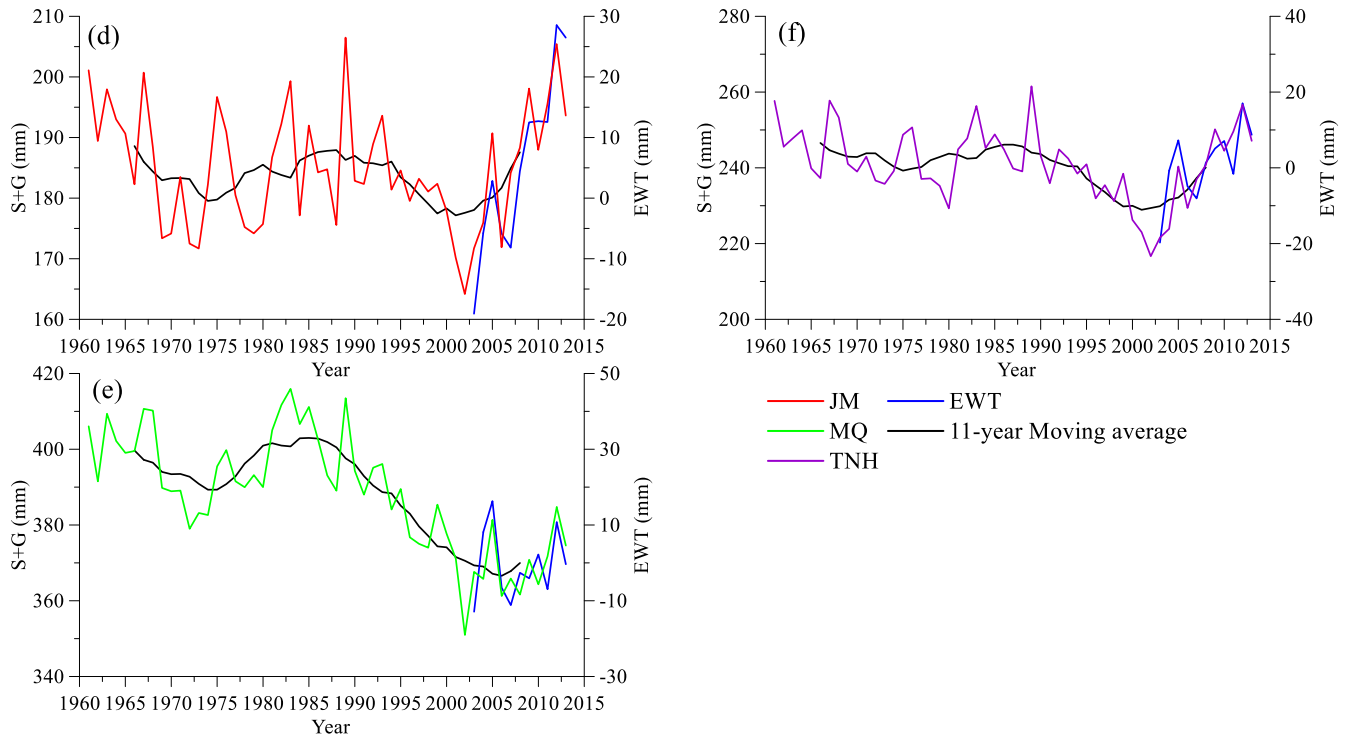

Figure 2 Water storage change obtained by ABCD model

Here S+G indicates annual soil water and ground water storage. Blue lines indicate EWT obtained for ensemble mean of the three Grace datasets. Simulated S+G agrees well with EWT. It proves efficiency of ABCD model in simulation discharge of the three sub-basins.

### 3. $\Delta(S+G)$ obtained by 11-year moving average method

$$\Delta(S + G) = (S + G)_i - (S + G)_{i-1}$$

$(S + G)_i$  indicates each value of 11-year moving average (S+G) series shown in Fig. 2.

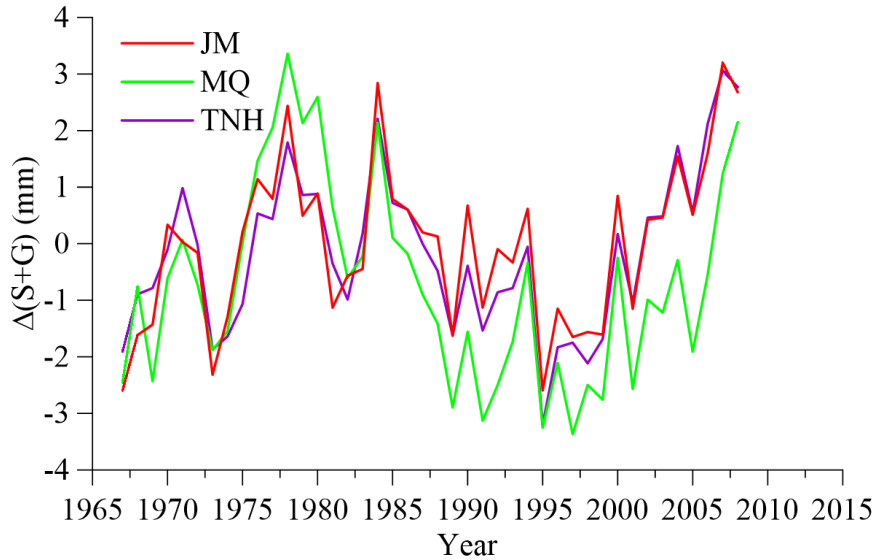

Figure 3 Water storage change

As indicated by Fig. 3,  $\Delta(S+G)$  amplitudes of the three sub-basins are less than 3 mm. So by using 11-year moving average method, water storage change is negligible in this study area.

## 5 Reference

Sakumura, C., Bettadpur, S., & Bruinsma, S. (2014). Ensemble prediction and intercomparison analysis of grace time - variable gravity field models. *Geophysical Research Letters*, 41(5), 1389-1397.

Thomas, H. A. (1981). Improved methods for national water assessment, Report to U.S. Water Resources Council, Contract WR15249270. Water Resour. Counc., Washington, DC: U.S. Water Resources Council.

Nash, J. E. and Sutcliffe, J. V.: River flow forecasting through conceptual models: Part I. A discussion of principles, *J. Hydrol.*, 10,282–290, 1970.
